# Supplementary material
Source: Copernicus journal article supplement (doi:10.5194/egusphere-2026-1786)
Supplement: Supplementary file 1 [file egusphere-2026-1786-supplement.pdf]

**Supplementary file for “Photochemical mechanism–dependent ozone formation and precursor sensitivity under varying NO<sub>x</sub> conditions”**

Yuelin Liu<sup>1,2†</sup>, Yuanjun Gong<sup>3†</sup>, Nan Wang<sup>2\*</sup>, Guangming Shi<sup>1,2</sup>, Fumo Yang<sup>1,2</sup>,  
Yuanhang Zhang<sup>3</sup>, Keding Lu<sup>3\*</sup>

<sup>1</sup>College of Architecture & Environment, Sichuan University, Chengdu, 610207, China

<sup>2</sup>College of Carbon Neutrality Future Technology, Sichuan University, Chengdu, 610207, China

<sup>3</sup>College of Environmental Sciences and Engineering, Peking University, Beijing, 100871, China

**\*Correspondence:** Keding Lu (k.lu@pku.edu.cn); Nan Wang (nan.wang@scu.edu.cn).  
Yuelin Liu and Yuanjun Gong have the same contribution to this work.

## **Supporting Information**

Supporting Information includes 5 pages, 1 figure and 4 tables

SI Figures S1, p3

SI Tables S1-S4, p4-p7

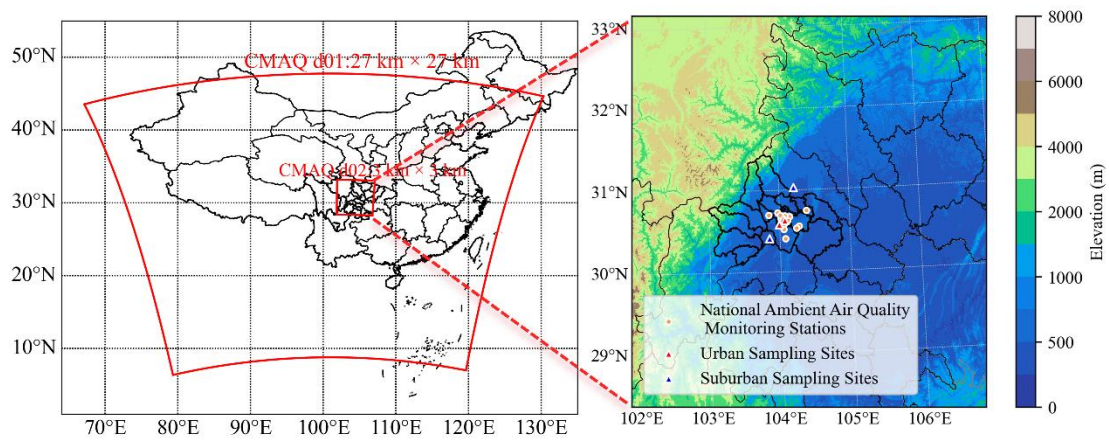

Figure S1 (a) Configuration of the nested domains used in the CMAQ simulations; (b) Topography of the simulation domain and distribution of Nation Ambient Air Quality Monitoring stations and in-situ field sites.

Table S1 Location information of the China National Environmental Monitoring stations in Chengdu and in-situ field sites.

| Type                                                      | Station ID | Station Name                     | Longitude     | Latitude      |
|-----------------------------------------------------------|------------|----------------------------------|---------------|---------------|
| China National<br>Environmental<br>Monitoring<br>stations | 1431A      | JinQuanLiangHe                   | 103.97275°E   | 30.72358333°N |
|                                                           | 1432A      | ShiLiDian                        | 104.176°E     | 30.6872°N     |
|                                                           | 1433A      | SanWaYao                         | 104.079°E     | 30.5706°N     |
|                                                           | 1434A      | ShaHePu                          | 104.1113889°E | 30.63°N       |
|                                                           | 1437A      | JunPingJie                       | 104.054°E     | 30.6578°N     |
|                                                           | 2880A      | DaShiXiLu                        | 104.0238889°E | 30.65638889°N |
|                                                           | 3136A      | LongQuanYiQuQuZhengFu            | 104.2725°E    | 30.5589°N     |
| in-situ field sites                                       | /          | Xinjin (XJ)                      | 103.81°E      | 30.41°N       |
|                                                           |            | Sichuan Academy of               |               |               |
|                                                           | /          | Environmental Sciences<br>(SAES) | 104.07°E      | 30.63°N       |

Table S2 Major Physics Options for WRF Simulations.

| Physics parameterization                 | Option               | Meaning of the option       |
|------------------------------------------|----------------------|-----------------------------|
| Microphysics                             | mp_physics=28        | Thompson Aerosol scheme     |
| Planetary boundary layer                 | bl_pbl_physics=2     | Mellor-Yamada-Janjic scheme |
| Long wave radiation                      | ra_lw_physics=4      | RRTMG scheme                |
| Shortwave radiation                      | ra_sw_physics=4      | RRTMG scheme                |
| Cumulus Parameterization                 | cu_physics=6         | Tiedtke scheme              |
| Land surface                             | sf_surface_physics=2 | Noah scheme                 |
| Surface layer                            | sf_sfclay_physics=2  | Eta Similarity scheme       |
| Urban Surface                            | sf_urban_physics=1   | Urban Canopy Model          |
| Pressure top (in Pa) to use in the model | 5000                 | The pressure top is 50 hPa  |

Table S3 The VOC emission species input into the CMAQ model under three photochemical mechanisms: CB06, SAPRC07 and RACM2.

|               | CB06    | SAPRC07 | RACM2   |
|---------------|---------|---------|---------|
| VOCs Emission | AACD    | AACD    | ACD     |
|               | ACET    | ACET    | ACE     |
|               | ALD2    | ACYE    | ALD     |
|               | ALDX    | ALK1    | API     |
|               | BENZENE | ALK2    | BALD    |
|               | CRES    | ALK3    | BENZENE |
|               | ETHA    | ALK4    | CSL     |
|               | ETH     | ALK5    | EOH     |
|               | ETOH    | ARO1    | ETE     |
|               | ETHY    | ARO2    | ETH     |
|               | FACD    | BACL    | GLY     |
|               | FORM    | BALD    | HC3     |
|               | GLY     | BENZENE | HC5     |
|               | IOLE    | CCHO    | HC8     |
|               | ISOP    | CRES    | HCHO    |
|               | KET     | ETHE    | ISO     |
|               | MEOH    | FACD    | KET     |
|               | MGLY    | GLY     | MACR    |
|               | OLE     | HCHO    | MEK     |
|               | PAR     | IPRD    | MGLY    |
|               | TERP    | ISOP    | MOH     |
|               | TOL     | MACR    | MVK     |
|               | XYLMN   | MEK     | OLI     |
|               | PRPA    | MEOH    | OLT     |
|               |         | MGLY    | ORA1    |
|               |         | MVK     | ORA2    |
|               |         | OLE1    | PHEN    |
|               |         | OLE2    | TOL     |
|               |         | PACD    | UALD    |
|               |         | PRD2    | XYM     |
|               |         | RCHO    | XYO     |
|               | TERP    | XYP     |         |

Table S4 Statistical metrics for photochemical mechanisms performance evaluation discussed in this study.

| Statistic/abbreviation      | Definition                                                                                                       | Notes                         |
|-----------------------------|------------------------------------------------------------------------------------------------------------------|-------------------------------|
| Correlation coefficient (R) | $\frac{\sum[(S_i - \bar{S}) \times (O_i - \bar{O})]}{\sqrt{\sum(S_i - \bar{S})^2 \times \sum(O_i - \bar{O})^2}}$ | $-1 \leq R \leq 1$            |
| Index of Agreement (IOA)    | $1 - \frac{\sum(S_i - O_i)^2}{\sum( S_i - \bar{O}  +  O_i - \bar{O} )^2}$                                        | $0 \leq IOA \leq 1$           |
| Mean Fractional Bias (MFB)  | $\frac{2}{N} \sum \frac{(S_i - O_i)}{(S_i + O_i)} \times 100$                                                    | $-200\% \leq MFB \leq +200\%$ |
| Mean Fractional Error (MFE) | $\frac{2}{N} \sum \frac{ S_i - O_i }{(S_i + O_i)} \times 100$                                                    | $0 \leq MFE \leq +200\%$      |

Note. Subscript  $i$  represents the pairing of  $N$  observations  $O$  and simulations  $S$  by site and time.

Overbars signify means over site and/or time.
